# Supplementary material for: The influence of a supervised group exercise intervention combined with active lifestyle recommendations on breast cancer survivors’ health, physical functioning, and quality of life indices: study protocol for a randomized and controlled trial
Source: PubMed Central journal article supplement (PMC8684206; doi:10.1186/s13063-021-05843-z), 2021-12-18
Supplement: 13063_2021_5843_MOESM4_ESM.pdf [file 13063_2021_5843_MOESM4_ESM.pdf]

**PARECER CONSUBSTANCIADO DO CEP**

Elaborado pela Instituição Coparticipante

**DADOS DO PROJETO DE PESQUISA**

**Título da Pesquisa:** EFEITOS DE DIFERENTES MODALIDADES DE ATIVIDADE FÍSICA SOBRE A APTIDÃO AERÓBIA, FORÇA MUSCULAR E QUALIDADE DE VIDA EM SOBREVIVENTES DE CÂNCER DE MAMA

**Pesquisador:** Patricia Chakur Brum

**Área Temática:**

**Versão:** 2

**CAAE:** 80445817.0.3001.0065

**Instituição Proponente:** FUNDACAO FACULDADE DE MEDICINA

**Patrocinador Principal:** Financiamento Próprio

**DADOS DO PARECER**

**Número do Parecer:** 2.836.680

**Apresentação do Projeto:**

O presente projeto visa analisar se um programa de atividade física supervisionado e não estruturado apresenta vantagens potenciais em relação às demais modalidades já investigadas, reunindo benefícios típicos de uma atividade supervisionada (maior segurança, maior aderência, maior motivação) com as vantagens de uma atividade não estruturada (maior exequibilidade, menor controle, maior conforto, menor custo, maior acessibilidade), promovendo benefícios superiores em qualidade de vida em pacientes sobreviventes de câncer de mama.

**Objetivo da Pesquisa:**

Comparar os efeitos da atividade física estruturada e supervisionada, atividade física não estruturada e supervisionada e atividade física não estruturada não supervisionada sobre aptidão aeróbia, força muscular e qualidade de vida em pacientes sobreviventes de neoplasia de mama.

Comparar os efeitos de diferentes modalidades de atividade física sobre

A) Desfechos primários:

1. Consumo pico de oxigênio (VO<sub>2</sub>pico);
2. Força de preensão manual;
3. Capacidade Funcional de membros inferiores;

**Endereço:** DOUTOR ARNALDO 251 21º andar sala 36

**Bairro:** PACAEMBU

**CEP:** 01.246-903

**UF:** SP

**Município:** SAO PAULO

**Telefone:** (11)3893-4401

**E-mail:** cep.fm@usp.br

Continuação do Parecer: 2.836.680

4. Qualidade de vida.

B) Desfechos secundários:

1. Fadiga;

2. Presença de linfedema;

3. Atividade física diária;

4. Auto imagem;

5. Dor;

6. Composição corporal;

7. Marcadores imunológicos;

8. Balanço autonômico.

**Avaliação dos Riscos e Benefícios:**

Após a coleta de sangue, uma vermelhidão poderá aparecer no antebraço que irá desaparecer em algumas horas. Após a realização do teste de esforço a voluntária poderá sentir-se cansada, mas será avaliada e acompanhada por um médico, permanecendo monitorizada até que aconteça sua total recuperação. O teste de função cardiopulmonar e os procedimentos de coleta de sangue serão realizados por médico devidamente habilitado

**Comentários e Considerações sobre a Pesquisa:**

Estudo 1 - Atividade não estruturada e supervisionada (treinamento de remo coletivo) - NS x Atividade não estruturada e não supervisionada (cartilha informativa- padrão de saúde pública recomendada pela OMS e ANS-Ministério da Saúde) - NN

Estudo 2 - Atividade não Estruturada e supervisionada (treinamento de remo coletivo) - NS x Atividade física estruturada e supervisionada (padrão ouro- recomendada pelo ACSM) - ES

**Considerações sobre os Termos de apresentação obrigatória:**

TCLE de acordo com a Resolução 466 (corrigido informações sobre CEP-FMUSP, conforme solicitado no parecer anterior).

Sobre a alteração na Plataforma Brasil a respeito da retenção de amostras, pesquisadora justificou que como o Instituto do Câncer do Estado de São Paulo é a instituição coparticipante, não é possível realizar a alteração solicitada no momento, porém compromete-se a enviar emenda ao ao

**Endereço:** DOUTOR ARNALDO 251 21º andar sala 36

**Bairro:** PACAEMBU

**CEP:** 01.246-903

**UF:** SP

**Município:** SAO PAULO

**Telefone:** (11)3893-4401

**E-mail:** cep.fm@usp.br

USP - FACULDADE DE  
MEDICINA DA UNIVERSIDADE  
DE SÃO PAULO - FMUSP

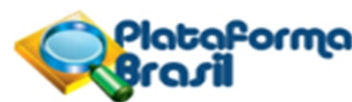

Continuação do Parecer: 2.836.680

CEP da instituição principal (EEFEUSP) com a alteração solicitada.

**Conclusões ou Pendências e Lista de Inadequações:**

Após a aprovação do projeto pelo CEP-FMUSP, submeter uma emenda ao

CEP da instituição principal (EEFEUSP) com a alteração no item da Plataforma Brasil sobre retenção de amostras.

**Considerações Finais a critério do CEP:**

**Este parecer foi elaborado baseado nos documentos abaixo relacionados:**

| Tipo Documento                                            | Arquivo                                       | Postagem               | Autor                | Situação |
|-----------------------------------------------------------|-----------------------------------------------|------------------------|----------------------|----------|
| Informações Básicas do Projeto                            | PB_INFORMAÇÕES_BÁSICAS_DO_PROJETO_1175073.pdf | 10/08/2018<br>12:57:05 |                      | Aceito   |
| Declaração de Pesquisadores                               | Resposta_parecer_CEPFMUSP.pdf                 | 10/08/2018<br>12:56:12 | Patricia Chakur Brum | Aceito   |
| TCLE / Termos de Assentimento / Justificativa de Ausência | TECLE_padrao_PlataformaCEP.doc                | 10/08/2018<br>12:54:52 | Patricia Chakur Brum | Aceito   |
| Outros                                                    | Parecer_ICESP.pdf                             | 04/07/2018<br>16:42:07 | Patricia Chakur Brum | Aceito   |
| TCLE / Termos de Assentimento / Justificativa de Ausência | tecleremama.doc                               | 27/11/2017<br>16:18:50 | Patricia Chakur Brum | Aceito   |
| Projeto Detalhado / Brochura Investigador                 | remama.pdf                                    | 27/11/2017<br>16:18:33 | Patricia Chakur Brum | Aceito   |

**Situação do Parecer:**

Aprovado

**Necessita Apreciação da CONEP:**

Não

**Endereço:** DOUTOR ARNALDO 251 21º andar sala 36

**Bairro:** PACAEMBU

**CEP:** 01.246-903

**UF:** SP

**Município:** SAO PAULO

**Telefone:** (11)3893-4401

**E-mail:** cep.fm@usp.br

USP - FACULDADE DE  
MEDICINA DA UNIVERSIDADE  
DE SÃO PAULO - FMUSP

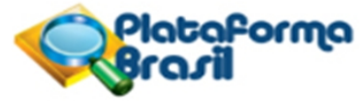

Continuação do Parecer: 2.836.680

SAO PAULO, 22 de Agosto de 2018

---

**Assinado por:**  
**Antonio de Padua Mansur**  
**(Coordenador)**

**Endereço:** DOUTOR ARNALDO 251 21º andar sala 36

**Bairro:** PACAEMBU

**CEP:** 01.246-903

**UF:** SP

**Município:** SAO PAULO

**Telefone:** (11)3893-4401

**E-mail:** cep.fm@usp.br
